1 **Title**

2 A GAL80 collection to inhibit GAL4 transgenes

3 in *Drosophila* olfactory sensory neurons

4

5 **Authors**

6 Eliason, Jessica<sup>\*†1</sup>; Afify, Ali<sup>‡</sup>; Potter, Christopher<sup>‡</sup>; Matsumura, Ichiro<sup>†</sup>

7

8 **Affiliations**

9 <sup>\*</sup>Janelia Research Campus, Howard Hughes Medical Institute; Ashburn, VA, 20147;

10 United States

11 <sup>†</sup>Department of Biochemistry; Emory University School of Medicine; Atlanta, GA,

12 30322; United States

13 <sup>‡</sup>Solomon H. Snyder Department of Neuroscience; Johns Hopkins University School of

14 Medicine; Baltimore, MD, 21205; United States

15

16

17

18

19

20

21

22

---

<sup>1</sup> 19700 Helix Drive; Ashburn, VA; 20147

23 **Running Title**

24 GAL80 in *Drosophila* olfactory neurons

25

26 **Key Words**

27 Olfaction; GAL80; *Drosophila*; Odorant Receptor; Sensory Neurons

28

29 **Corresponding authors' contact information**

30 Jessica Eliason

31 19700 Helix Drive

32 2E.120.2

33 Ashburn, VA 20147

34 (209) 712-9343

35 [eliasonj@janelia.hhmi.org](mailto:eliasonj@janelia.hhmi.org);

36 &

37 Ichiro Matsumura

38 1510 Clifton Rd NE

39 4119 Rollins Research Center

40 Atlanta, GA 30322

41 (404) 727-5625

42 [imatsum@emory.edu](mailto:imatsum@emory.edu)

43

44

45

46  
47  
48  
49  
50  
51  
52  
53  
54  
55  
56  
57  
58  
59  
60  
61  
62  
63  
64  
65  
66  
67

## ABSTRACT

Fruit flies recognize hundreds of ecologically relevant odors and respond appropriately to them. The complexity, redundancy and interconnectedness of the olfactory machinery complicate efforts to pinpoint the functional contributions of any component neuron or receptor to behavior. Some contributions can only be elucidated in flies that carry multiple mutations and transgenes, but the production of such flies is currently labor-intensive and time-consuming. Here, we describe a set of transgenic flies that express the *Saccharomyces cerevisiae* GAL80 in specific olfactory sensory neurons (*OrX-GAL80s*). The GAL80s effectively and specifically subtract the activities of GAL4-driven transgenes that impart anatomical and physiological phenotypes. *OrX-GAL80s* can allow researchers to efficiently activate only one or a few types of functional neurons in an otherwise nonfunctional olfactory background. Such experiments will improve our understanding of the mechanistic connections between odorant inputs and behavioral outputs at the resolution of only a few functional neurons.

## INTRODUCTION

The olfactory system of *Drosophila melanogaster* is often the subject in studies of memory, evolution, gene choice, development and odorant-induced behavior. It is a good model system because of its relatively stereotyped neuronal circuitry, complex behaviors and convenient genetic tools.

68           In *Drosophila*, most olfactory sensory neurons (OSNs) typically expresses a  
69   single odorant receptor (OR) from a genomic repertoire of 60 genes (Vosshall et al.  
70   1999; Robertson, Warr, and Carlson 2003; Vosshall, Wong, and Axel 2000; Clyne et al.  
71   1999; Goldman et al. 2005). The promoter of an OR gene can be employed to label  
72   specific subsets of OSNs with a particular transgene (Fishilevich and Vosshall 2005;  
73   Couto, Alenius, and Dickson 2005). ORs, which vary in sensitivity and specificity to a  
74   wide range of different odorants, determine the firing kinetics and odor-response  
75   dynamics of each OSN (Hallem and Carlson 2006; Hallem, Ho, and Carlson 2004;  
76   Couto, Alenius, and Dickson 2005; Fishilevich and Vosshall 2005; de Bruyne, Clyne,  
77   and Carlson 1999; de Bruyne, Foster, and Carlson 2001; Dobritsa et al. 2003; Elmore et  
78   al. 2003; Kreher et al. 2008).

79  
80           Most OSNs express Odorant Receptor Co-Receptor (Orco), a highly conserved  
81   member of the olfactory receptor family (Krieger et al. 2003; Vosshall and Hansson  
82   2011), in addition to a single selected OR. Though Orco usually does not contribute to  
83   the structure of the odorant binding site (Jung, borst, and Haag 2011; Nakagawa and  
84   Vosshall 2009; Nichols and Luetje 2010; P. L. Jones, Pask, and Rinker 2011), it is  
85   essential for odorant-invoked signaling in flies. Without Orco, the co-expressed OR  
86   cannot localize to the dendritic membrane or relay an odor-evoked signal (Larsson et al.  
87   2004; Benton et al. 2006). Orco null flies are largely anosmic, though some  
88   chemosensation remains due to the presence of ionotropic receptors and gustatory  
89   receptors, which do not require Orco to function (Silbering et al. 2011; Benton et al.

90 2009; Kwon et al. 2007; W. D. Jones et al. 2007). The Orco promoter is consequently a  
91 convenient device for the expression of transgenes in most OSNs.

92

93 The olfactory organs, the antenna and maxillary palp, contain OSNs dendrites  
94 within structures called sensilla. ORs and Orco are embedded in the dendritic  
95 membrane. OSN axons project to the antennal lobes in the brain of the animal. Each  
96 antennal lobe consists of ~50 globular synaptic sites called glomeruli. All OSNs on the  
97 periphery that expresses the same OR converge onto their own unique glomerulus. For  
98 example, all OSNs expressing Or22a will send axons to the DM2 glomerulus in the  
99 antennal lobe while all OSNs expressing Or82a will send axons to the VA6 glomerulus  
100 (**Figure 1**). The stereotyped organization of OSNs and their projections is known as the  
101 olfactory sensory map (Vosshall, Wong, and Axel 2000; Fishilevich and Vosshall 2005;  
102 Couto, Alenius, and Dickson 2005; Stocker et al. 1990). The regularity of this map is a  
103 key feature that makes *Drosophila* olfaction such a useful model, as any aberration to  
104 the typical pattern will be apparent. The apparent simplicity of the map (**Figure 1**),  
105 however, obscures mechanistic complexities that are yet to be discovered, in part  
106 because necessary tools remain unavailable.

107

108 *Drosophila* geneticists have traditionally relied on genetic mutations or deletions  
109 to understand how complex biological systems normally work. Most alleles are  
110 recessive, so homozygotes must be bred over multiple generations. Achieving  
111 homozygosity of a mutation while also adding transgenes to the system often requires  
112 the creation of recombinant chromosomes produced after multiple generations of

113 crossing and PCR screening. Classical genetic strategies thus limit the number and  
114 complexity of combinatorial genotypes that one can achieve. More challenging  
115 experimental questions demand more facile and versatile genetic tools.

116

117         The GAL4/UAS gene regulation system has become a *defacto* standard in  
118 studies of *Drosophila*. GAL4 is a yeast transcription activator that binds to the Upstream  
119 Activating Sequence (UAS) and induces expression of downstream genes (Giniger,  
120 Varnum, and Ptashne 1985). By driving GAL4 expression from an OR promoter,  
121 specific expression of a *UAS-transgene* can be obtained for any OSN subtype. An *OrX-*  
122 *GAL4* line exists for almost every OR. This collection of GAL4 lines is a powerful toolbox  
123 since different *UAS-transgenes* can be introduced into a line via conventional mating.  
124 For example, human  $\alpha$ -synuclein has been expressed in OSNs to model human  
125 Parkinson's disease (A. Y. Chen et al. 2014). Alternatively, protein expression levels  
126 can be knocked down using any specified *UAS-RNAi* transgene.

127

128         A variety of existing compatible effectors can be used study different aspects of  
129 neuronal communication. The *UAS-Kir2.1* effector is used as an example in  
130 experiments described below. This inward rectifier potassium channel electrically  
131 inactivates the neurons that express it (Hodge 2009; Baines et al. 2001; Johns et al.  
132 1999). Similarly, *shibire<sup>ts</sup>* or tetanus toxin can be used to silence synaptic  
133 communications (van der Blik and Meyerowitz 1991; kitamoto 2002; Kitamoto 2001; M.  
134 S. Chen et al. 1991; Sweeney et al. 1995; Baines et al. 1999), *reaper/grim/hid* genes  
135 can be used to physically kill neurons by inducing their own apoptotic pathways (Song

136 and Steller 1999; Abrams 1999), or ricin toxin can be expressed ectopically to kill  
137 neurons. Conversely, neurons can be selectively activated with *trp1a* or a variety of  
138 other channelrhodopsin transgenes (Boyden 2011; Pulver et al. 2009).

139

140 If GAL4 is a standard on-switch for nearly any desired transgene, GAL80 is the  
141 logical off-switch. GAL80 binds the GAL4 transcriptional activation domain, thereby  
142 preventing recruitment of RNA polymerase (Ma and Ptashne 1987). GAL80 crosses are  
143 much more convenient than classical breeding approaches (**Figure 2**). In order to have  
144 a single functional OSN in an otherwise silent olfactory system, the traditional method  
145 uses an *Orco* null mutation (Larsson et al. 2004). In this genetic setup, *Orco* mutant flies  
146 are mostly anosmic, but function is restored to one OSN subset with *Or-GAL4*, *UAS-*  
147 *Orco* transgenes (Olsen, Bhandawat, and Wilson 2007; DasGupta and Waddell 2008;  
148 Hoare, McCrohan, and Cobb 2008; Hoare et al. 2011; Benton et al. 2006; Fishilevich et  
149 al. 2005) (**Figure 2a**). An *Orco-GAL4*, *UAS-effector*, *Or-GAL80* method can be used  
150 instead (**Figure 2b**). *Kir2.1* is used as an example of an effector (Hodge 2009; Baines et  
151 al. 2001; Johns et al. 1999). Classical breeding strategies (**Figure 2a**) may look less  
152 complicated on paper than GAL80 crosses (**Figure 2b**) but are actually more time-  
153 consuming and limited. The *Orco* mutation must be homozygous. Since most  
154 *Drosophila* transgenes are embedded into the same two chromosomes (2 or 3)  
155 recombination and PCR screening may be required to achieve this homozygosity.

156

157 Neurons seldom operate autonomously, but rather groups of neurons coordinate  
158 within a circuit to provide an organism with perception and behavior. An investigation of

159 the behavioral impact provided by a limited number of different functional neuronal  
160 types would require additional genes. The elaboration of genotypes (**Figure 2**) to  
161 restore pairs or groups of functional OSNs in a nonfunctional background normally  
162 requires generations of crosses (followed by PCR screens for desired recombinants). A  
163 GAL80 strategy can shorten this process by achieving similar results in only one or two  
164 generations with no necessary recombinant creation. Furthermore, a GAL80 strategy  
165 takes advantage of the interchangeable variety of existing *UAS-transgene* lines. Here  
166 we describe a new collection of *OrX-GAL80* lines designed to complement existing *OrX-*  
167 *GAL4* lines, and demonstrate their potential utility for neuroanatomical studies of the  
168 *Drosophila* olfaction model.

169

170

## MATERIALS AND METHODS

### 171 *Fly Stocks*

172 Flies were reared on standard cornmeal/molasses food and kept at 25C with a  
173 16 hours on/8hours off light cycle. All lines were obtained from the Indiana University  
174 Bloomington Stock Center and the Janelia Research Campus. Any recombinants made  
175 were validated with PCR.

176 Stock List:

177 Or7a-GAL4 #23907

178 Or7a-GAL4 #23908

179 Or10a-GAL4 #9944

180 Or13a-GAL4 #9946

181 Or13a-GAL4 #23886



|     |                   |
|-----|-------------------|
| 182 | Or19a-Gal4 #24617 |
| 183 | Or22a-GAL4 #9951  |
| 184 | Or22a-GAL4 #9952  |
| 185 | Or22b-GAL4 #23891 |
| 186 | Or33c-GAL4 #23893 |
| 187 | Or35a-GAL4 #9967  |
| 188 | Or42a-GAL4 #9970  |
| 189 | Or42b-GAL4 #9971  |
| 190 | Or43b-Gal4 #23894 |
| 191 | Or46a-GAL4 #23291 |
| 192 | Or47a-GAL4 #9981  |
| 193 | Or56a-GAL4 #9988  |
| 194 | Or59b-GAL4 #23897 |
| 195 | Or59c-GAL4 #23899 |
| 196 | Or67a-GAL4 #23904 |
| 197 | Or67d-GAL4 #9998  |
| 198 | Or71a-GAL4 #23121 |
| 199 | Or82a-GAL4 #23125 |
| 200 | Orco-GAL4 #23292  |
| 201 | Orco-GAL4 #26818  |
| 202 | Or85a-GAL4 #23133 |
| 203 | Or85b-GAL4 #23911 |
| 204 | Or85c-GAL4 #23913 |

205 Gr21a-GAL4 #24147  
206 Or22a-mcd8::GFP #52620  
207 Gr21a-mcd8::GFP #52619  
208 Orco<sup>2</sup> #23130  
209 UAS-Orco #23145  
210 UAS-mcd8::GFP #5130  
211 UAS-mcd8::GFP #5137  
212 UAS-Kir2.1 Janelia stock #3015545  
213 UAS-Kir2.1 Janelia stock #3015298  
214 UAS-Kir2.1::eGFP Janelia stock #BS00312  
215 pJFRC19-13xLexAop2-IVS-myr::GFP-p10 (attP8) Janelia stock #1171146  
216 pJFRC59-13xLexAop2-IVS-myr::GFP-p10 (attP40) Janelia stock #3015445

217

218

### 219 *GAL80 Creation*

220 Primers were designed to capture the entire promoters described by (Couto,  
221 Alenius, and Dickson 2005) (see **Table S1**). Promoters were amplified from genomic  
222 DNA using Q5 High Fidelity PCR (NEB #M0491S) and added to entry vectors using the  
223 pENTR/D-TOPO system (Invitrogen 2012b). Recombination with the pBP-GAL80Uw-6  
224 (Addgene #26236) destination vector was done using the LR Clonase II system  
225 (Invitrogen 2012a). To ensure no mutations, no gaps, and correct orientation, the  
226 complete promoters were sequenced in the destination vector using the sequencing  
227 primers shown in **Table S2**. PhiC31 site-directed transgenesis was performed by

228 Genetivision Inc. All GAL80 transgenes were inserted at the attP2 site. A single Or-  
229 LexA line was also created using the Or22a-promoter entry vector and  
230 pBPnIsLexA::p65Uw (Addgene #26230).

231

### 232 *Immunohistochemistry*

233 Female adult brains were dissected one day after eclosion in cold S2 Schneider's  
234 Insect Medium (Sigma Aldrich #S0146) and fixed while nutating for 55 minutes at room  
235 temperature in 2mL 2%PFA (Electron Microscopy Sciences #15713) in protein loBind  
236 Tubes (Eppendorf #022431102). Brains were washed 4x, 15min per wash while  
237 nutating with 2mL PBT buffer (1xPBS, Cellgro #21-040, with 0.5% TritonX-100, Sigma  
238 Aldrich #X100). Brains were then blocked with 200 $\mu$ L 5% Goat serum (ThermoFischer.  
239 #16210064) in PBT for 90 minutes while nutating, upright. Block was removed and 200  
240  $\mu$ L primary antibodies in PBT were added for 4 hours at room temperature and then  
241 transferred to 4C for 36-48 hours while nutating, upright. Primary antibodies: mouse  $\alpha$ -  
242 bruchpilot (Developmental Studies Hybridoma Bank. #nc82-s) at 1:30, rabbit  $\alpha$ -GFP at  
243 1:1000 (Thermo Fischer #A11122), or rabbit  $\alpha$ -Tom at 1:500 (clontech #632393).  
244 Monoclonal antibody nc82 identifies Bruchpilot. Bruchpilot can serve as a general  
245 neuropil marker because it is required in synaptic zones (Wagh et al. 2006). Larval  
246 brains were collected from third instar larvae and fixed in 4% PFA. Primary antibodies:  
247 mouse  $\alpha$ -neuroglian (Developmental Studies Hybridoma Bank. #BP104) at 1:50 and  
248 rabbit  $\alpha$ -GFP at 1:500. Brains were washed 4x, 15min per wash while nutating with 2mL  
249 PBT. 200 $\mu$ L secondary antibodies in PBT were then added for 4 hours at room  
250 temperature and then 3 overnights at 4C while nutating upright. Secondary antibodies:

251 AF568 goat  $\alpha$ -mouse (Life Technologies #A11031) at 1:400 and AF488 goat  $\alpha$ -rabbit  
252 (ThermoFischer #A11034) at 1:800. Tubes were protected from light at all times after  
253 secondary antibodies had been added. Brains were washed again 4x, 15min per wash  
254 while nutating with 2mL PBT. Then washed with 1xPBS and mounted using Vectashield  
255 mounting media (Vector Labs #H-1000). Confocal images were taken with Leica800  
256 microscope.

257

### 258 *Single Sensillum Recordings*

259 SSRs were performed as described in Lin et al 2015 (Lin and Potter 2015). GFP  
260 labeled ab1 and ab3 sensilla were identified using a Zeiss AxioExaminer D1 compound  
261 microscope with eGFP filter cube (FL Filter Set 38 HE GFP shift free). A glass recording  
262 electrode filled with ringers solution (7.5g of NaCl+0.35g of KCl+0.279g of CaCl<sub>2</sub>-2H<sub>2</sub>O  
263 in 1L of H<sub>2</sub>O) was inserted into the base of the sensillum. To test ab1 (Gr21a) response,  
264 CO<sub>2</sub> was delivered through a tube ending with a Pasteur pipette that was inserted for 1  
265 second into a hole in a plastic pipette directed at the antenna. This plastic pipette  
266 (Denville Scientific Inc, 10ml pipette) carried a purified continuous air stream (8.3 ml/s)  
267 that used a stimulus controller (Syntech) at the time of CO<sub>2</sub> delivery to correct for the  
268 increased air flow. To test ab3 (Or22a) response, 20  $\mu$ l of E2-Hexenal or Isoamyl  
269 acetate (diluted to 1% in mineral oil) was pipetted on a piece of filter paper (1X2 cm) in  
270 a Pasteur pipette. The Pasteur pipette was then inserted into the hole of the plastic  
271 pipette that carried continuous air stream to the antenna. For odorant delivery, the  
272 stimulus controller (Syntech) was used to divert a 1 s pulse of charcoal-filtered air (5  
273 ml/s) into the Pasteur pipette containing the odorant.

274

275 Signals were acquired and analyzed using AUTOSPIKE software (USB-IDAC System;  
276 Syntech). Spikes were counted in a 500 ms window from 500 ms after CO<sub>2</sub> delivery and  
277 multiplied by 2 to calculate spikes/second. Then, the spikes in 1000ms before CO<sub>2</sub>  
278 delivery were subtracted to calculate the increase in spike rate in response to CO<sub>2</sub>  
279 ( $\Delta$ spikes/second). For each genotype, 6 flies (4-8 days old) were tested, with 1-3  
280 sensilla tested in each fly.

281

282

## RESULTS

### 283 *Design of GAL80 Constructs*

284 The following criteria were used to choose OR promoters for the collection. i) The  
285 ORs should be relevant to current research as shown by the number of studies that  
286 used it. ii) The ORs should represent a variety of expression patterns (larval or adult,  
287 antennae or maxillary palps, sensillary class etc.). iii) Finally, the ORs should reflect a  
288 variety of different odorant response profiles. The promoter regions were defined based  
289 largely on the work of Couto *et al*, 2005.

290

291 Equimolar expression of GAL4 and GAL80 is not always sufficient to effectively  
292 eliminate GAL4 activity so the pBP-GAL80uW-6 vector was used. This vector contains a  
293 modified GAL80 sequence, designed to increase the stability and expression of its gene  
294 product (Pfeiffer et al. 2010). A few *OrX-GAL80s* were already made with this vector  
295 and used effectively. (Gao, Clandinin, and Luo 2015) pioneered the technique by

296 creating a limited number of OrX-GAL80s. This work is a logical extension and makes  
297 many additional *OrX-GAL80s* available for general use.

298

### 299 *Testing GAL80 Efficacy and Specificity*

300 GAL80 lines were created for the following odorant receptor promoters: Or7a,  
301 Or10a, Or13a, Or19a, Or22a, Or22b, Or33c, Or35a, Or42a, Or42b, Or43b, Or47a,  
302 Or56a, Or59b, Or59c, Or67a, Or67d, Or71a, Or82a, Orco, Or85a, Or85b, Or85c, and  
303 Gr21a. To examine GAL4 subtraction *in vivo*, *OrX-GAL80* flies were crossed to flies with  
304 the genotype *OrX-GAL4, UAS-GFP*. OSNs expressing the same OR can be identified  
305 from their specific glomerulus in the antennal lobe (**Figure 1**). *OrX-GAL4, UAS-GFP*  
306 flies show robust expression of the GFP reporter gene in their respective glomeruli.  
307 However, when *OrX-GAL80* is added to the genotype, GFP expression is entirely  
308 absent, indicating a robust antagonism of GAL4 activity (**Figure 3**). The efficacy of  
309 *Or22b-GAL80* could not be determined because the *OR22b-GAL4, UAS-GFP* control  
310 did not show robust or reliable GFP signaling in the first place. The created *Or7a-*  
311 *GAL80* line was not effective at subtracting GFP signal. Though these lines are not  
312 included in Figure 3, they will still be available in the Bloomington Stock Center. Several  
313 of the GAL80 lines also have expression in larvae. GAL4 subtraction was examined in  
314 larval brains using the *UAS-GFP* reporter gene. In larvae, GAL80 reduced but did not  
315 eliminate GAL4 activity (**Figure S1a**).

316

317 The *OrX-GAL80* lines were checked to ensure they would not have aberrant  
318 expression in untargeted OSN subtypes. The pBP-GAL80uW-6 vector contains a

319 *Drosophila* Synthetic Core Promoter (DSCP). DSCP is an effective means of using  
320 enhancer elements to drive strong expression (Pfeiffer et al. 2008), but it could also  
321 cause the GAL80s to have nonspecific or leaky expression. Therefore, a version of  
322 pBP-GAL80uW-6 was cloned with the DSCP removed. However, when the DSCP was  
323 absent, GAL80 expression was insufficient to subtract GAL4 activity (**Figure S1b**). A  
324 few lines were tested to see if DSCP causes nonspecific GAL80 expression. For these  
325 lines, an *OrY-GAL80* did not impede GAL4 activity of an *OrX-GAL4* neuron (**Figure**  
326 **S1c**). Due to the uneven expression in an *Orco-GAL4, UAS-GFP* line, it could not be  
327 determined if each *OrX-GAL80* subtracts GAL4 from only one glomerulus in an  
328 otherwise fully-labeled brain, but results shown in Figure S1c give reasonable  
329 confidence that the GAL80s do not have widespread nonspecific expression. It can also  
330 be noted that the GAL80 subtraction does not interfere with reporter gene expression in  
331 a genetic system that does not use GAL4. When *Or22a-GAL80* is used in conjunction  
332 with *Or22a-GFP*, containing no GAL4/UAS intermediary, the GFP is still expressed  
333 (**Figure S1d**). These images, showing subtraction of reporter gene expression, confirm  
334 that GAL4 activity is suppressed anatomically by the GAL80 lines.

335

336 To confirm GAL4 was suppressed physiologically by the GAL80s, Single  
337 Sensillum Recordings (SSRs) were used to assay electrical activity of OSNs. *Gr21a-*  
338 *GFP* was used to identify sensilla of interest without interfering with the  
339 GAL4/UAS/GAL80 system. *Gr21a* neurons are housed in ab1 sensilla. Carbon Dioxide  
340 exposure causes a robust response in *Gr21a ab1C* neurons (Hallem and Carlson 2006;  
341 Hallem, Ho, and Carlson 2004; Fishilevich and Vosshall 2005; deBruyne:2001bs W. D.

342 Jones et al. 2007; Kwon et al. 2007; de Bruyne, Foster, and Carlson 2001). When  
343 *Gr21a-GFP* flies were exposed to CO<sub>2</sub>, their ab1C sensillar neurons showed robust  
344 responses (mean  $\Delta$ spikes/s=88, N=8 sensilla). Kir2.1-containing neurons are expected  
345 to show little to no spontaneous firing (Olsen, Bhandawat, and Wilson 2007; Hoare,  
346 McCrohan, and Cobb 2008). Adding Kir2.1 to Gr21a neurons (genotype *Gr21a-GFP*,  
347 *Gr21a-GAL4*, *UAS-Kir2.1*) greatly reduced spiking responses to CO<sub>2</sub> (mean  
348  $\Delta$ spikes/s=14, N=12 sensilla,  $p=0.01$ ). When Gr21a-GAL80 was added (genotype  
349 *Gr21a-GFP*, *Gr21a-GAL4*, *UAS-Kir2.1*, *Gr21a-GAL80*), responses to CO<sub>2</sub> were restored  
350 (mean  $\Delta$ spikes/s=94, N=6 sensilla,  $p<0.001$ . No significant difference from genotype  
351 *Gr21a-GFP*,  $p= .26$ ) (**Figure 4a**).

352

353 To make sure the system also worked for neurons expressing an OR protein (in  
354 additional to a GR), SSR was also done with ab3 sensilla. Ab3 houses Or22a-  
355 expressing neurons. This receptor is known to be activated by a diverse set of odorants,  
356 including Isoamyl acetate and E2-hexenal (Hallem and Carlson 2006; Hallem, Ho, and  
357 Carlson 2004; Fishilevich and Vosshall 2005; deBruyne:2001bs W. D. Jones et al.  
358 2007; Kwon et al. 2007; de Bruyne, Foster, and Carlson 2001). A transgene was  
359 necessary to visualize the neurons without interfering with the GAL4/UAS/GAL80  
360 system, but *Or22a-GFP* was insufficiently bright to identify sensilla for SSR. A new  
361 *Or22a-LexA* transgenic animal was therefore created using the same promoter that was  
362 used to create the *Or22a-GAL80* gene (this line is also available through Bloomington).  
363 When crossed to a *LexAop2-GFP* line, the ab3 sensilla showed bright fluorescence.  
364 When *Or22a-LexA*, *LexAop2-GFP* flies were exposed to Isoamyl acetate or to E2-



365 hexenal, their sensillar neurons showed robust responses (mean  $\Delta$ spikes/s=67.86 and  
366 27.71, N=7 and 7 sensilla, respectively). Unlike the Gr21a neurons, Kir2.1 expression in  
367 the Or22a neurons effectively eliminated both spontaneous and odor-evoked activity.  
368 (mean  $\Delta$ spikes/s=0, N=7 sensilla,  $p<.001$  for both odorants). Both activities could be  
369 restored with the addition of the *Or22a-GAL80* gene (Isoamyl acetate: mean  $\Delta$ spikes/s  
370 =74.29, N=7 sensilla,  $p<.001$ ; E2-Hexenal: mean  $\Delta$ spikes/s =25, N=7 sensilla,  $p<.001$ ).  
371 Neurons showed some low-level responses to mineral oil alone, the solvent used for the  
372 odorants (**Figure 4b**). Only genotype 3 *Or22a-LexA, LexAop2-GFP, Or22a-GAL4, UAS-*  
373 *Kir2.1, Or22a-GAL80* showed significantly higher responses to mineral oil than  
374 genotypes *Or22a-LexA, LexAop2-GFP* ( $p=.01$ ) and *Or22a-LexA, LexAop2-GFP, Or22a-*  
375 *GAL4, UAS-Kir2.1* ( $p=.005$ ), but the latter two genotypes showed no significant  
376 response to mineral oil alone. The results in **Figure 4** confirm that GAL80 functions  
377 effectively to prevent GAL4-induced activity in OSNs.

378

379

## DISCUSSION

380

381 The collection of GAL80 lines subtracts GAL4 activity efficiently and specifically  
382 in OSNs. In anatomical studies, reporter gene expression from the GAL4/UAS system is  
383 suppressed. Neurons silenced with Kir2.1 expression have normal firing capacity  
384 restored when GAL4 is antagonized using the GAL80 lines.

385

386 In behavioral assays, using a GAL80 transgene will be more flexible than mutant  
387 lines and less cumbersome than crafting the required recombinants as the complexity of

388 the genotype increases. Though in some special circumstances, olfactory sensory  
389 neurons have been shown to produce behaviors autonomously, this is not a widely  
390 applicable principle, and further investigation upon this principle requires better tools.  
391 For example, Fishilevish et al (2005) used larvae in their study to restore aversion with a  
392 single functional OSN subtype, but the larval olfactory system may be fundamentally  
393 different from adults in this respect., (Bhandawat et al. 2010) also showed that single  
394 glomerular activity is sufficient to invoke a behavioral response, but that study was done  
395 using an intact and fully functional olfactory background, so some neuronal cooperation  
396 may still have occurred. (DasGupta and Waddell 2008) provided evidence that a single  
397 functional OSN subtype is sufficient to learn odor discrimination, and Gao et al (2015)  
398 gave convincing evidence of aversive restoration in adults with only one functional OSN.

399

400         However, the extent to which the restoration of single-OSN behavior depends on  
401 the odorant and receptor used is still unknown. Only a small subset of receptors have  
402 been tested. The current models of odor coding by the olfactory system predict that a  
403 coordinated effort of many OSNs is usually required to produce a behavioral output.  
404 Paired neurons in sensilla can affect the firing dynamics of their neighbors in the  
405 periphery (Dobritsa et al. 2003; Su et al. 2012; Kazama and Wilson 2009), and  
406 downstream neurons such as interneurons and projection neurons may rely on  
407 synchronized input from multiple OSN types (Chou et al. 2010; Wilson 2011; Yaksi and  
408 Wilson 2010; Hong and Wilson 2015; Kazama, Yaksi, and Wilson 2011; Olsen,  
409 Bhandawat, and Wilson 2007; Ng et al. 2002; Acebes et al. 2011). GAL80 tools open

410 more possibilities to combinatorially activate subsets of neurons. The hope is that  
411 additional researchers will use the reagents and validate them in their own assays.

412

413 Researchers encounter a significant technical obstacle to the understanding of  
414 olfactory function if they need to create genotypes with small groups of interacting  
415 neurons in isolation. The tools presented here facilitate the activation or deactivation of  
416 combinations of particular neurons, thereby overcoming this obstacle. The lines are  
417 available to order through Bloomington Stock Center.

418

419

#### **AUTHOR CONTRIBUTIONS**

420 Conceptualization, JE and IM; Methodology, JE; Formal Analysis, JE and AA;  
421 Investigation, JE and AA; Writing—Original Draft, JE; Writing—Review and Editing, AA,  
422 CP, IM; Visualization, JE and AA; Supervision, IM; Funding Acquisition, IM

423

424

#### **ACKNOWLEDGEMENTS**

425 Funding for this project comes from the National Science Foundation (MCB- 1413062).  
426 The authors report no conflicts of interest. We thank Heather Dionne for cloning advice,  
427 Yoshi Aso for the use of his behavioral setup and Janelia FlyLight for consulting on  
428 imaging and immunostaining.

429

430

#### **FIGURE LEGENDS**

431 **Figure 1: Olfactory Sensory Map.** Each neuron in the olfactory system expresses one  
432 type of odorant receptor (OR). Or22a (teal) and Or82a (gold) are used here as

433 examples. Neurons usually exist in pairs or groups in sensilla within the olfactory  
434 organs—antenna or maxillary palp. Neurons expressing the same OR are distributed  
435 throughout the periphery, but project their axons onto the same glomerulus in the  
436 antennal lobe of the brain. For example, all Or22a-expressing neurons synapse onto the  
437 DM2 glomerulus while all Or82a-expressing neurons synapse onto the VA6 glomerulus.

438

439 **Figure 2: Advantages of using a GAL80 approach over a null mutation.** a) **Current**

440 **method with available reagents.** In order to examine a single type of Olfactory

441 Sensory Neuron (OSN) without interference from other OSNs, one can use an Orco null

442 mutant. Without Orco, ORs cannot reach the cell membrane or function properly. Orco

443 mutants are mostly anosmic (unable to smell.) A single OR can then be restored using

444 two transgenes, *OrX-GAL4* and *UAS-Orco*. *Or22a-GAL4* is shown here as an example.

445 This fly may require the making and validating of one or more recombinant

446 chromosomes, since the Orco mutation must be homozygous. In more complicated

447 systems, e.g. restoring more than one OSN, multiple recombinants would need to be

448 made and validated at a cost of several months of crossing. b) **Using a GAL80.** GAL80

449 is a potent GAL4 inhibitor. All olfactory neurons could be silenced using any number of

450 transgenes in an *Orco-GAL4*, *UAS-effector* (such as *UAS-Kir2.1*) genotype. A single

451 OSN subtype can then be restored using an *OrX-GAL80* (such as *Or22a-GAL80*). This

452 system requires no recombinant creation, and is amenable to the use of various

453 effectors or additional transgenes without requiring recombinant construction. (Receptor

454 appearance, orientation, and heterodimerization is based on previous designs by

455 Neuhaus et al. (2005), Benton et al. (2006), Smart et al. (2008), and (Smart et al. 2008;  
456 Neuhaus et al. 2005; Benton et al. 2006; Benton 2009)

457

458 **Figure 3: OR-GAL80 reagents eliminate GAL4 activity.** All antennal lobes are stained  
459 with anti-nc82 (a general neuropil marker, grey) and anti-GFP (green). The orientation  
460 of each image is dorsal-up, ventral-down, lateral-right, medial-left. Scale bars indicate  
461 20µm. Each of the brains shown has the genotype *OrX-GAL4, UAS-GFP*. The specific  
462 receptor promoter is given above each column. The top row in each set shows GFP  
463 expression in these lines without GAL80. Notice how each neuron's target in the  
464 antennal lobe glomeruli is expressing GFP. Each bottom row shows the brains  
465 containing an additional *Or-GAL80* gene. Note how GAL80 effectively inhibits GAL4  
466 activity, as seen by the elimination of GFP expression. The images are representative of  
467 the 5-20 brains examined per genotype. GAL4 inactivation was 100% penetrant in one  
468 day old female flies.

469

470 **Figure 4: Olfactory neuron responses towards odors in Single Sensillum**

471 **Recordings (SSR).** In box plots on the left, each circle shows response in an individual  
472 sensillum, and filled squares indicate the means. On the right of each plot, example  
473 SSR traces are shown for each genotype. (\* indicates  $.01 > p > .005$ , \*\* indicates  $p < .001$ )

474 a) **Ab1C SSR responses.** Ab1C neurons are visualized using the *Gr21a-GFP* gene.

475 Top: Sensilla respond strongly to CO<sub>2</sub>, and adding *Kir2.1* reduces response to CO<sub>2</sub>.

476 Response is restored when *Gr21a-GAL80* is added. Bottom: Air was used as a control

477 for CO<sub>2</sub> experiments. Air does not cause an odor-evoked neuronal response, and

478 adding the *Kir2.1* or *GAL80* genes does not affect the spontaneous signaling  
479 responses. b) **Ab3 SSR responses.** Ab3 neurons are visualized using the *Or22a-LexA*  
480 *and LexAop2-GFP* genes. Sensilla respond to Isoamyl Acetate and to E2-Hexenal.  
481 Adding *Kir2.1* eliminates both odor-evoked and spontaneous activity in these neurons.  
482 Spontaneous and odor-evoked activity is restored when *Or22a-GAL80* is added.  
483 Odorants were diluted in mineral oil and neurons from the GAL80 restorative genotype  
484 did show low-level responses to mineral oil alone (bottom).

485

## 486 REFERENCES

- 487 Abrams, J M. 1999. "An Emerging Blueprint for Apoptosis in *Drosophila*.." *Trends in Cell*  
488 *Biology* 9 (11): 435–40.
- 489 Acebes, Angel, Alfonso Martín-Peña, Valérie Chevalier, and Alberto Ferrús. 2011.  
490 "Synapse Loss in Olfactory Local Interneurons Modifies Perception.." *The Journal of*  
491 *Neuroscience : the Official Journal of the Society for Neuroscience* 31 (8): 2734–45.  
492 doi:10.1523/JNEUROSCI.5046-10.2011.
- 493 Baines, R A, S G Robinson, M Fujioka, J B Jaynes, and M Bate. 1999. "Postsynaptic  
494 Expression of Tetanus Toxin Light Chain Blocks Synaptogenesis in *Drosophila*.." *Current Biology* 9 (21): 1267–70.
- 495 Baines, Richard A, Jay P Uhler, Annemarie Thompson, Sean T Sweeney, and Michael  
496 Bate. 2001. "Altered Electrical Properties in *Drosophila* Neurons Developing Without  
497 Synaptic Transmission." *Journal of Neuroscience* 21 (5). Society for Neuroscience:  
498 1523–31. doi:10.1016/S0960-9822(99)80510-7.
- 499 Benton, R. 2009. "Evolution and Revolution in Odor Detection." *Science* 326 (5951):  
500

- 501 382–83. doi:10.1126/science.1181998.
- 502 Benton, Richard, Kirsten S Vannice, Carolina Gomez-Diaz, and Leslie B Vosshall. 2009.
- 503 “Variant Ionotropic Glutamate Receptors as Chemosensory Receptors in
- 504 *Drosophila*.” *Cell* 136 (1): 149–62. doi:10.1016/j.cell.2008.12.001.
- 505 Benton, Richard, Silke Sachse, Stephen W Michnick, and Leslie B Vosshall. 2006.
- 506 “Atypical Membrane Topology and Heteromeric Function of *Drosophila* Odorant
- 507 Receptors in Vivo.” *PLoS Biology* 4 (2): e20–18. doi:10.1371/journal.pbio.0040020.
- 508 Bhandawat, V, G Maimon, M H Dickinson, and R I Wilson. 2010. “Olfactory Modulation
- 509 of Flight in *Drosophila* Is Sensitive, Selective and Rapid.” *Journal of Experimental*
- 510 *Biology* 213 (21): 3625–35. doi:10.1242/jeb.040402.
- 511 Boyden, Edward S. 2011. “A History of Optogenetics: the Development of Tools for
- 512 Controlling Brain Circuits with Light..” *F1000 Biology Reports* 3 (11): 11.
- 513 doi:10.3410/B3-11.
- 514 Chen, Alex Y, Shouzhen Xia, Paul Wilburn, and Tim Tully. 2014. “Olfactory Deficits in
- 515 an Alpha-Synuclein Fly Model of Parkinson's Disease..” Edited by Mel B Feany.
- 516 *PLoS ONE* 9 (5): e97758. doi:10.1371/journal.pone.0097758.
- 517 Chen, M S, R A Obar, C C Schroeder, T W Austin, C A Poodry, S C Wadsworth, and R
- 518 B Vallee. 1991. “Multiple Forms of Dynamin Are Encoded by *Shibire*, a *Drosophila*
- 519 Gene Involved in Endocytosis..” *Nature* 351 (6327): 583–86. doi:10.1038/351583a0.
- 520 Chou, Ya-Hui, Maria L Spletter, Emre Yaksi, Jonathan C S Leong, Rachel I Wilson, and
- 521 Liqun Luo. 2010. “Diversity and Wiring Variability of Olfactory Local Interneurons in
- 522 the *Drosophila* Antennal Lobe.” *Nature Neuroscience*, February. Nature Publishing
- 523 Group, 1–13. doi:10.1038/nn.2489.

- 524 Clyne, P J, C G Warr, M R Freeman, D Lessing, J Kim, and J R Carlson. 1999. "A Novel  
525 Family of Divergent Seven-Transmembrane Proteins: Candidate Odorant Receptors  
526 in *Drosophila*.." *Neuron* 22 (2): 327–38.
- 527 Couto, Africa, Mattias Alenius, and Barry J Dickson. 2005. "Molecular, Anatomical, and  
528 Functional Organization of the *Drosophila* Olfactory System." *Current Biology* 15  
529 (17): 1535–47. doi:10.1016/j.cub.2005.07.034.
- 530 DasGupta, Shamik, and Scott Waddell. 2008. "Learned Odor Discrimination in  
531 *Drosophila* Without Combinatorial Odor Maps in the Antennal Lobe." *Current*  
532 *Biology* 18 (21): 1668–74. doi:10.1016/j.cub.2008.08.071.
- 533 de Bruyne, M, P J Clyne, and J R Carlson. 1999. "Odor Coding in a Model Olfactory  
534 Organ: the *Drosophila* Maxillary Palp.." *The Journal of Neuroscience : the Official*  
535 *Journal of the Society for Neuroscience* 19 (11). Society for Neuroscience: 4520–32.
- 536 de Bruyne, Marien, Kara Foster, and John R Carlson. 2001. "Odor Coding in the  
537 *Drosophila* Antenna." *Neuron* 30 (2): 537–52. doi:10.1016/S0896-6273(01)00289-6.
- 538 Dobritsa, Anna A, Wynand van der Goes van Naters, Coral G Warr, R Alexander  
539 Steinbrecht, and John R Carlson. 2003. "Integrating the Molecular and Cellular  
540 Basis of Odor Coding in the *Drosophila* Antenna.." *Neuron* 37 (5): 827–41.
- 541 Elmore, Tamara, R Ignell, John R Carlson, and Dean P Smith. 2003. "Targeted  
542 Mutation of a *Drosophila* Odor Receptor Defines Receptor Requirement in a Novel  
543 Class of Sensillum | Journal of Neuroscience." *The Journal of Neuroscience : the*  
544 *Official Journal of the Society for Neuroscience* 23 (30). Society for Neuroscience:  
545 9906–12. doi:10.1038/81774.
- 546 Fishilevich, Elane, Ana I Domingos, Kenta Asahina, Félix Naef, Leslie B Vosshall, and



- 547 Matthieu Louis. 2005. "Chemotaxis Behavior Mediated by Single Larval Olfactory  
548 Neurons in *Drosophila*.." *Current Biology* 15 (23): 2086–96.  
549 doi:10.1016/j.cub.2005.11.016.
- 550 Fishilevich, Elane, and Leslie B Vosshall. 2005. "Genetic and Functional Subdivision of  
551 the *Drosophila* Antennal Lobe." *Current Biology* 15 (17): 1548–53.  
552 doi:10.1016/j.cub.2005.07.066.
- 553 Gao, Xiaojing J, Thomas R Clandinin, and Liqun Luo. 2015. "Extremely Sparse  
554 Olfactory Inputs Are Sufficient to Mediate Innate Aversion in *Drosophila*.." Edited by  
555 Matthieu Louis. *PLoS ONE* 10 (4). Public Library of Science: e0125986.  
556 doi:10.1371/journal.pone.0125986.
- 557 Giniger, E, S M Varnum, and M Ptashne. 1985. "Specific DNA Binding of GAL4, a  
558 Positive Regulatory Protein of Yeast.." *Cell* 40 (4): 767–74.
- 559 Goldman, Aaron L, Wynand van der Goes van Naters, Derek Lessing, Coral G Warr,  
560 and John R Carlson. 2005. "Coexpression of Two Functional Odor Receptors in  
561 One Neuron." *Neuron* 45 (5): 661–66. doi:10.1016/j.neuron.2005.01.025.
- 562 Hallem, Elissa A, and John R Carlson. 2006. "Coding of Odors by a Receptor  
563 Repertoire." *Cell* 125 (1): 143–60. doi:10.1016/j.cell.2006.01.050.
- 564 Hallem, Elissa A, Michael G Ho, and John R Carlson. 2004. "The Molecular Basis of  
565 Odor Coding in the *Drosophila* Antenna." *Cell* 117 (7): 965–79.  
566 doi:10.1016/j.cell.2004.05.012.
- 567 Hoare, D J, C R McCrohan, and M Cobb. 2008. "Precise and Fuzzy Coding by Olfactory  
568 Sensory Neurons." *Journal of Neuroscience* 28 (39): 9710–22.  
569 doi:10.1523/JNEUROSCI.1955-08.2008.

570 Hoare, Derek J, James Humble, Ding Jin, Niall Gilding, Rasmus Petersen, Matthew  
571 Cobb, and Catherine McCrohan. 2011. "Modeling Peripheral Olfactory Coding in  
572 *Drosophila Larvae*." Edited by Bradley Steven Launikonis. *PLoS ONE* 6 (8):  
573 e22996–11. doi:10.1371/journal.pone.0022996.

574 Hodge, James J L. 2009. "Ion Channels to Inactivate Neurons in *Drosophila*." *Frontiers*  
575 *in Molecular Neuroscience* 2: 1–10. doi:10.3389/neuro.02.013.2009.

576 Hong, Elizabeth J, and Rachel I Wilson. 2015. "Simultaneous Encoding of Odors by  
577 Channels with Diverse Sensitivity to Inhibition." *Neuron* 85 (3). Elsevier Inc.: 573–  
578 89. doi:10.1016/j.neuron.2014.12.040.

579 Invitrogen. 2012a. "pBAD/Thio His TOPO Manual," March, 1–74.

580 Invitrogen. 2012b. "pENTR™ Directional TOPO® Cloning Kits," March, 1–52.

581 Johns, D C, R Marx, R E Mains, B O'Rourke, and E Marbán. 1999. "Inducible Genetic  
582 Suppression of Neuronal Excitability.." *Journal of Neuroscience* 19 (5): 1691–97.

583 Jones, P L, G M Pask, and D C Rinker. 2011. "Functional Agonism of Insect Odorant  
584 Receptor Ion Channels." In. doi:10.1073/pnas.1102425108/-  
585 /DCSupplemental/pnas.201102425SI.pdf.

586 Jones, Walton D, Pelin Cayirlioglu, Ilona Grunwald Kadow, and Leslie B Vosshall. 2007.  
587 "Two Chemosensory Receptors Together Mediate Carbon Dioxide Detection in  
588 *Drosophila*." *Nature* 445 (7123). Nature Publishing Group: 86–90.  
589 doi:10.1038/nature05466.

590 Jung, Sarah Nicola, alexander borst, and Juergen Haag. 2011. "Flight Activity Alters  
591 Velocity Tuning of Fly Motion-Sensitive Neurons.." *The Journal of Neuroscience* :  
592 *the Official Journal of the Society for Neuroscience* 31 (25). Society for

- 593 Neuroscience: 9231–37. doi:10.1523/JNEUROSCI.1138-11.2011.
- 594 Kazama, H, E Yaksi, and R I Wilson. 2011. “Cell Death Triggers Olfactory Circuit  
595 Plasticity via Glial Signaling in *Drosophila*.” *Journal of Neuroscience* 31 (21): 7619–  
596 30. doi:10.1523/JNEUROSCI.5984-10.2011.
- 597 Kazama, Hokto, and Rachel I Wilson. 2009. “Origins of Correlated Activity in an  
598 Olfactory Circuit.” *Nature Neuroscience* 12 (9): 1136–44. doi:10.1038/nn.2376.
- 599 Kitamoto, T. 2001. “Conditional Modification of Behavior in *Drosophila* by Targeted  
600 Expression of a Temperature-Sensitive *Shibire* Allele in Defined Neurons..” *Journal*  
601 *of Neurobiology* 47 (2): 81–92.
- 602 kitamoto, Toshihiro. 2002. “Conditional Disruption of Synaptic Transmission Induces  
603 Male-Male Courtship Behavior in *Drosophila*..” *Proceedings of the National*  
604 *Academy of Sciences* 99 (20): 13232–37. doi:10.1073/pnas.202489099.
- 605 Kreher, Scott A, Dennis Mathew, Junhyong Kim, and John R Carlson. 2008.  
606 “Translation of Sensory Input Into Behavioral Output via an Olfactory System..”  
607 *Neuron* 59 (1): 110–24. doi:10.1016/j.neuron.2008.06.010.
- 608 Krieger, J, O Klink, C Mohl, K Raming, and H Breer. 2003. “A Candidate Olfactory  
609 Receptor Subtype Highly Conserved Across Different Insect Orders.” *Journal of*  
610 *Comparative Physiology A* 189 (7): 519–26. doi:10.1007/s00359-003-0427-x.
- 611 Kwon, Jae Young, Anupama Dahanukar, Linnea A Weiss, and John R Carlson. 2007.  
612 “The Molecular Basis of CO<sub>2</sub> Reception in *Drosophila*..” *Proceedings of the National*  
613 *Academy of Sciences* 104 (9): 3574–78. doi:10.1073/pnas.0700079104.
- 614 Larsson, Mattias C, Ana I Domingos, Walton D Jones, M Eugenia Chiappe, Hubert  
615 Amrein, and Leslie B Vosshall. 2004. “Or83b Encodes a Broadly Expressed Odorant

- 616 Receptor Essential for *Drosophila* Olfaction.” *Neuron* 43 (5): 703–14.  
617 doi:10.1016/j.neuron.2004.08.019.
- 618 Lin, Chun-Chieh, and Christopher J Potter. 2015. “Re-Classification of *Drosophila*  
619 *Melanogaster* Trichoid and Intermediate Sensilla Using Fluorescence-Guided Single  
620 Sensillum Recording..” Edited by Matthieu Louis. *PLoS ONE* 10 (10). Public Library  
621 of Science: e0139675. doi:10.1371/journal.pone.0139675.
- 622 Ma, Jun, and Mark Ptashne. 1987. “The Carboxy-Terminal 30 Amino Acids of GAL4 Are  
623 Recognized by GAL80.” *Cell* 50 (1): 137–42. doi:10.1016/0092-8674(87)90670-2.
- 624 Nakagawa, Takao, and Leslie B Vosshall. 2009. “Controversy and Consensus:  
625 Noncanonical Signaling Mechanisms in the Insect Olfactory System.” *Current*  
626 *Opinion in Neurobiology* 19 (3): 284–92. doi:10.1016/j.conb.2009.07.015.
- 627 Neuhaus, Eva M, Günter Gisselmann, Weiyi Zhang, Ruth Dooley, Klemens Störtkuhl,  
628 and Hanns Hatt. 2005. “Odorant Receptor Heterodimerization in the Olfactory  
629 System of *Drosophila Melanogaster*.” *Nature Neuroscience* 8 (1): 15–17.  
630 doi:10.1038/nn1371.
- 631 Ng, Minna, Robert D Roorda, Susana Q Lima, Boris V Zemelman, Patrick Morcillo, and  
632 Gero Miesenböck. 2002. “Transmission of Olfactory Information Between Three  
633 Populations of Neurons in the Antennal Lobe of the Fly..” *Neuron* 36 (3): 463–74.
- 634 Nichols, Andrew S, and Charles W Luetje. 2010. “Transmembrane Segment 3 of  
635 *Drosophila Melanogaster* Odorant Receptor Subunit 85b Contributes to Ligand-  
636 Receptor Interactions..” *The Journal of Biological Chemistry* 285 (16): 11854–62.  
637 doi:10.1074/jbc.M109.058321.
- 638 Olsen, Shawn R, Vikas Bhandawat, and Rachel I Wilson. 2007. “Excitatory Interactions

- 639        Between Olfactory Processing Channels in the *Drosophila* Antennal Lobe.” *Neuron*  
640        54 (1): 89–103. doi:10.1016/j.neuron.2007.03.010.
- 641 Pfeiffer, B D, A Jenett, A S Hammonds, T T B Ngo, S Misra, C Murphy, A Scully, et al.  
642        2008. “Tools for Neuroanatomy and Neurogenetics in *Drosophila*.” *Proceedings of*  
643        *the National Academy of Sciences* 105 (28): 9715–20.  
644        doi:10.1073/pnas.0803697105.
- 645 Pfeiffer, B D, T T B Ngo, K L Hibbard, C Murphy, A Jenett, J W Truman, and G M  
646        Rubin. 2010. “Refinement of Tools for Targeted Gene Expression in *Drosophila*.”  
647        *Genetics* 186 (2): 735–55. doi:10.1534/genetics.110.119917.
- 648 Pulver, Stefan R, Stanislav L Pashkovski, Nicholas J Hornstein, Paul A Garrity, and  
649        Leslie C Griffith. 2009. “Temporal Dynamics of Neuronal Activation by  
650        Channelrhodopsin-2 and TRPA1 Determine Behavioral Output in *Drosophila*  
651        Larvae.” *Journal of Neurophysiology* 101 (6). American Physiological Society:  
652        3075–88. doi:10.1152/jn.00071.2009.
- 653 Robertson, Hugh M, Coral G Warr, and John R Carlson. 2003. “Molecular Evolution of  
654        the Insect Chemoreceptor Gene Superfamily in *Drosophila Melanogaster*.”  
655        *Proceedings of the National Academy of Sciences* 100 Suppl 2 (Supplement 2):  
656        14537–42. doi:10.1073/pnas.2335847100.
- 657 Silbering, A F, R Rytz, Y Grosjean, L Abuin, P Ramdya, G S X E Jefferis, and R Benton.  
658        2011. “Complementary Function and Integrated Wiring of the Evolutionarily Distinct  
659        *Drosophila* Olfactory Subsystems.” *Journal of Neuroscience* 31 (38): 13357–75.  
660        doi:10.1523/JNEUROSCI.2360-11.2011.
- 661 Smart, Renee, Aidan Kiely, Morgan Beale, Ernesto Vargas, Colm Carragher, Andrew V

- 662 Kralicek, David L Christie, Chen Chen, Richard D Newcomb, and Coral G Warr.  
663 2008. "Drosophila Odorant Receptors Are Novel Seven Transmembrane Domain  
664 Proteins That Can Signal Independently of Heterotrimeric G Proteins." *Insect*  
665 *Biochemistry and Molecular Biology* 38 (8): 770–80.  
666 doi:10.1016/j.ibmb.2008.05.002.
- 667 Song, Z, and H Steller. 1999. "Death by Design: Mechanism and Control of Apoptosis.."  
668 *Trends in Cell Biology* 9 (12): M49–M52.
- 669 Stocker, R F, M C Lienhard, A Borst, and K F Fischbach. 1990. "Neuronal Architecture  
670 of the Antennal Lobe in Drosophila Melanogaster.." *Cell and Tissue Research* 262  
671 (1). Springer-Verlag: 9–34. doi:10.1007/BF00327741.
- 672 Su, Chih-Ying, Karen Menuz, Johannes Reisert, and John R Carlson. 2012. "Non-  
673 Synaptic Inhibition Between Grouped Neurons in an Olfactory Circuit." *Nature* 492  
674 (7427). Nature Publishing Group: 66–71. doi:10.1038/nature11712.
- 675 Sweeney, Sean T, Kendal Broadie, John Keane, Heiner Niemann, and Cahir J O'Kane.  
676 1995. "Targeted Expression of Tetanus Toxin Light Chain in Drosophila Specifically  
677 Eliminates Synaptic Transmission and Causes Behavioral Defects." *Neuron* 14 (2):  
678 341–51. doi:10.1016/0896-6273(95)90290-2.
- 679 van der Blik, A M, and E M Meyerowitz. 1991. "Dynamin-Like Protein Encoded by the  
680 Drosophila Shibire Gene Associated with Vesicular Traffic.." *Nature* 351 (6325):  
681 411–14. doi:10.1038/351411a0.
- 682 Vosshall, L B, A M Wong, and R Axel. 2000. "An Olfactory Sensory Map in the Fly  
683 Brain.." *Cell* 102 (2): 147–59.
- 684 Vosshall, L B, and B S Hansson. 2011. "A Unified Nomenclature System for the Insect

685       Olfactory Coreceptor.” *Chemical Senses* 36 (6): 497–98.  
686       doi:10.1093/chemse/bjr022.

687   Vosshall, Leslie B, Hubert Amrein, Pavel S Morozov, Andrey Rzhetsky, and Richard  
688       Axel. 1999. “A Spatial Map of Olfactory Receptor Expression in the *Drosophila*  
689       Antenna.” *Cell* 96 (5): 725–36. doi:10.1016/S0092-8674(00)80582-6.

690   Wagh, Dhananjay A, Tobias M Rasse, Esther Asan, Alois Hofbauer, Isabell  
691       Schwenkert, Heike Dürrbeck, Sigrid Buchner, et al. 2006. “Bruchpilot, a Protein with  
692       Homology to ELKS/CAST, Is Required for Structural Integrity and Function of  
693       Synaptic Active Zones in *Drosophila*..” *Neuron* 49 (6): 833–44.  
694       doi:10.1016/j.neuron.2006.02.008.

695   Wilson, Rachel I. 2011. “Understanding the Functional Consequences of Synaptic  
696       Specialization: Insight From the *Drosophila* Antennal Lobe.” *Current Opinion in*  
697       *Neurobiology* 21 (2). Elsevier Ltd: 254–60. doi:10.1016/j.conb.2011.03.002.

698   Yaksi, Emre, and Rachel I Wilson. 2010. “Electrical Coupling Between Olfactory  
699       Glomeruli.” *Neuron* 67 (6). Elsevier Inc.: 1034–47.  
700       doi:10.1016/j.neuron.2010.08.041.

701  
702  
703  
704  
705  
706  
707

708

709

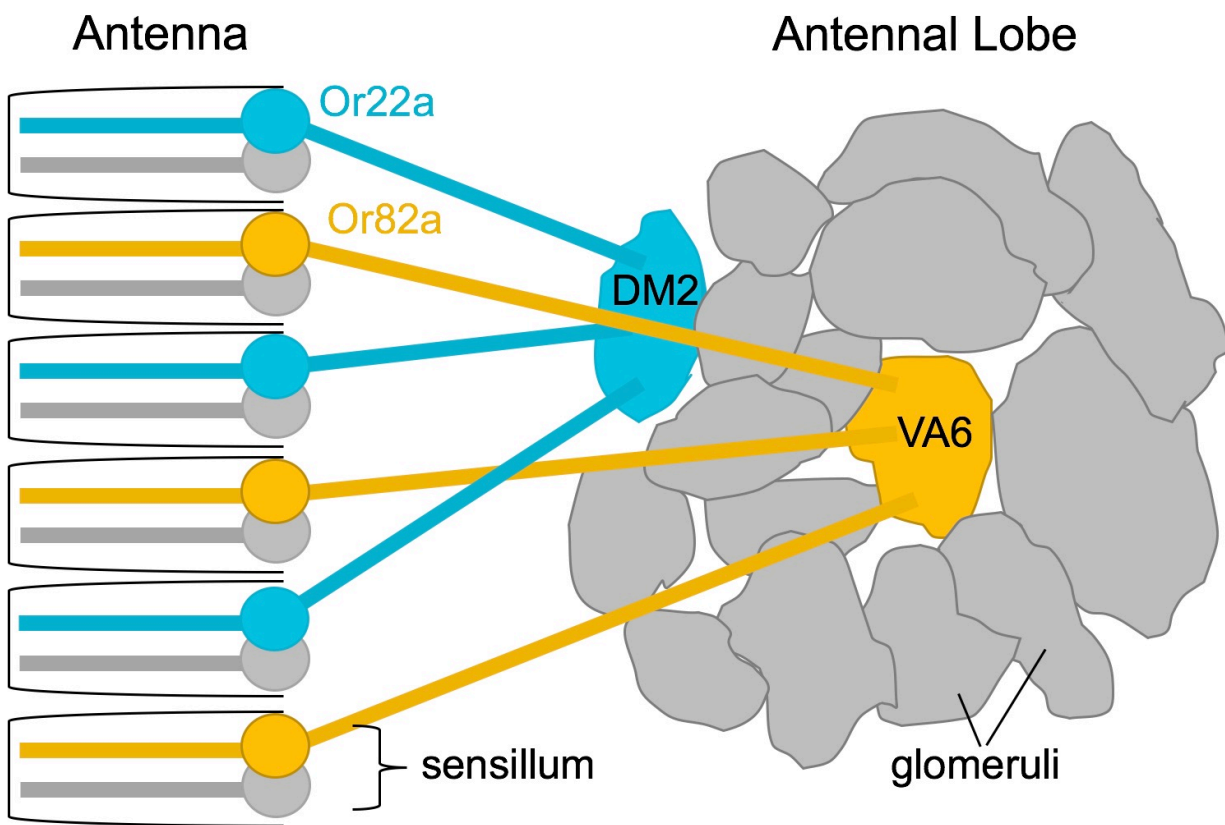

710

711 Figure 1

712

713

714

715

716

717

718

719

720



721

722

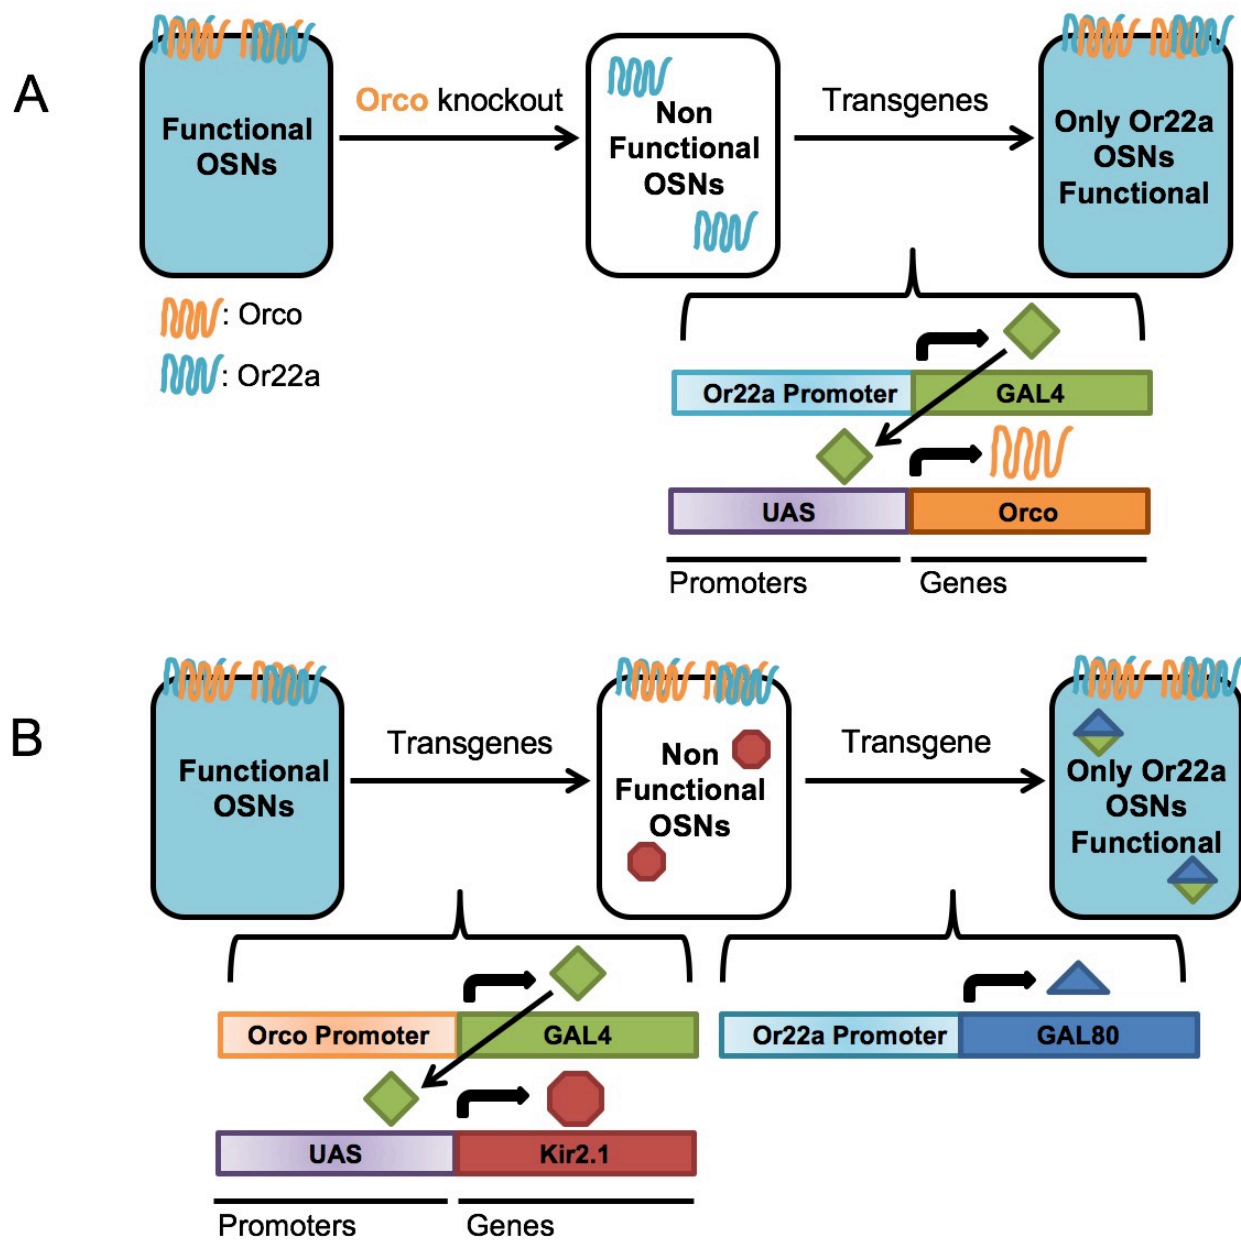

723

724 Figure 2

725

726

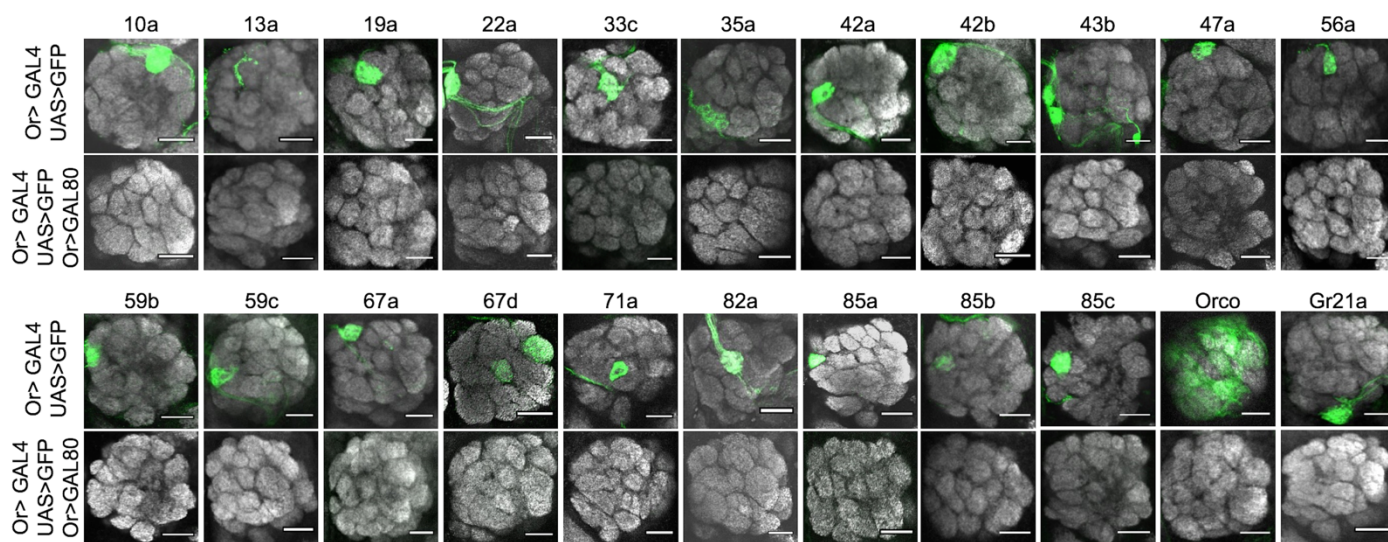

727

728 Figure 3

729 Figure 4

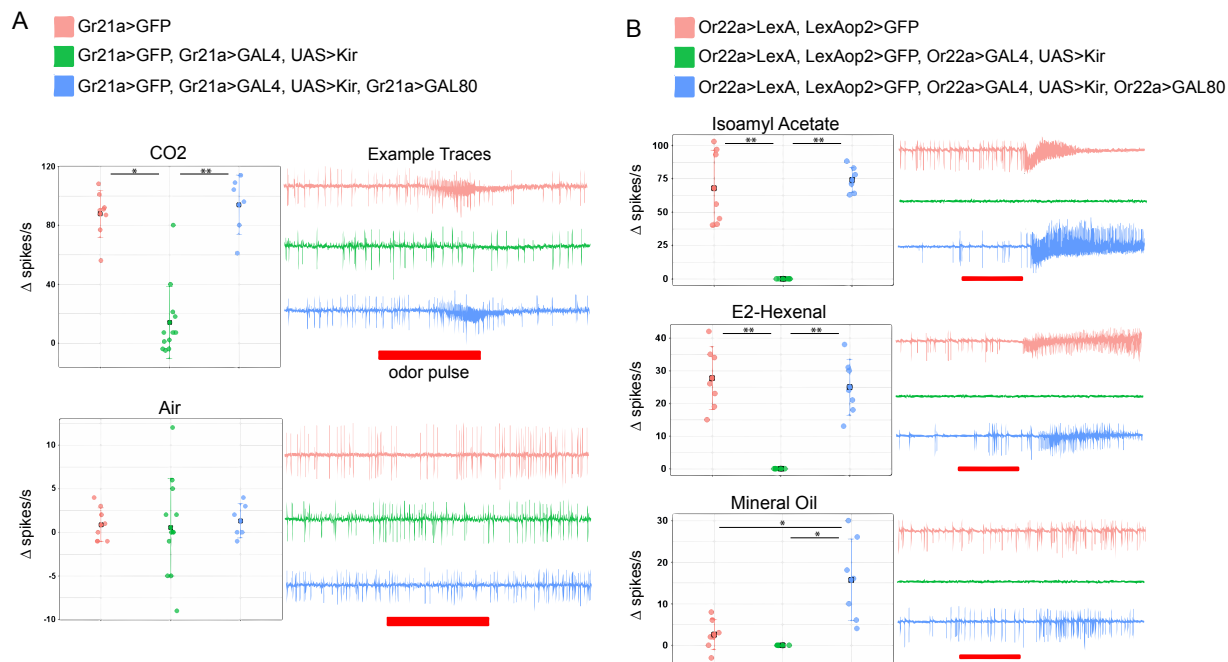

Source: http://biorxiv.org/content/10.1101/168468v2.full.pdf
